# Supplementary material for: Injectable hydrogels doped with PDA nanoparticles for photothermal bacterial inhibition and rapid wound healing in vitro
Source: Royal Society of Chemistry journal article supplement (doi:10.1039/d3ra08219a), 2024-01-01
Supplement: d3ra08219a1.pdf [file d3ra08219a1.pdf]

### Supporting information

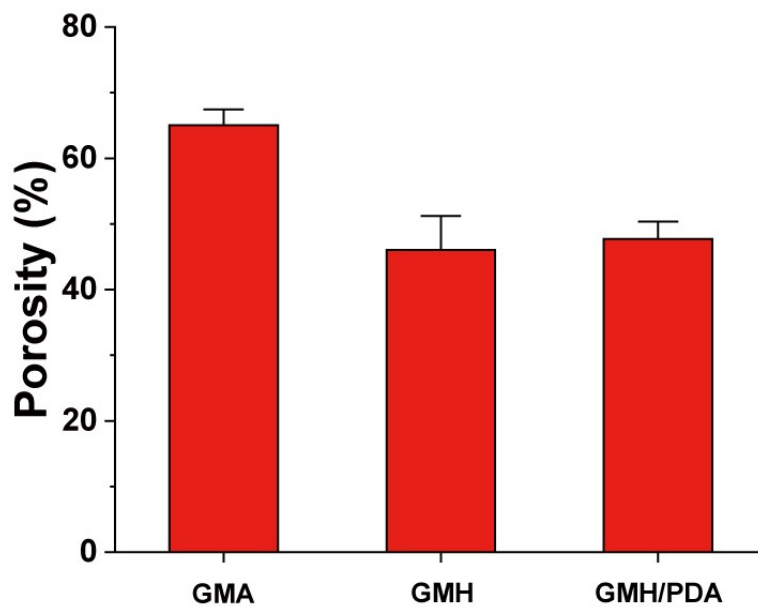

Fig.S1 The porosity of different hydrogels.

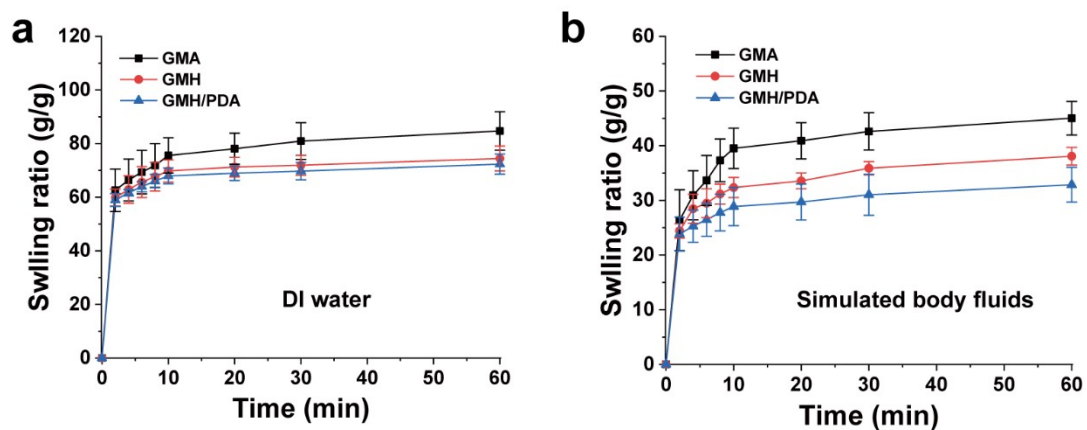

Fig.S2 Swelling kinetics of different hydrogels in DI water; (e) swelling kinetics of different hydrogels in SBF.

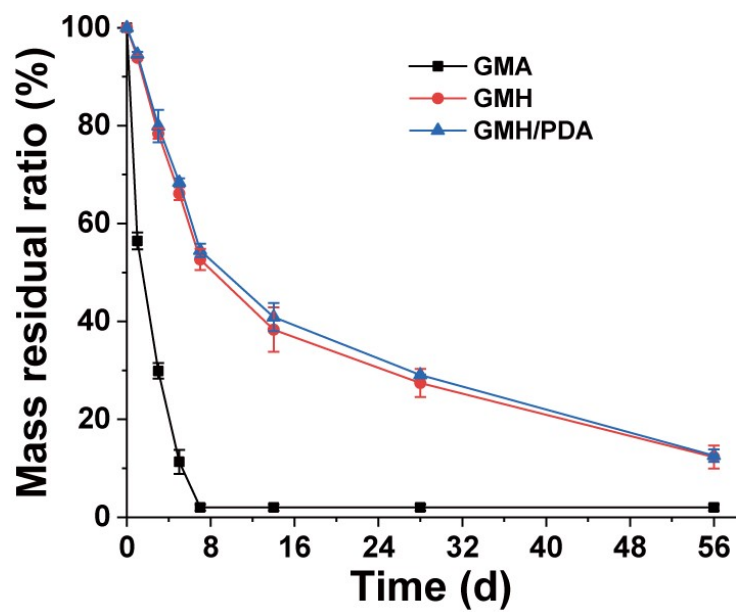

**Fig.S3** Degradation curves of different hydrogels in SBF.

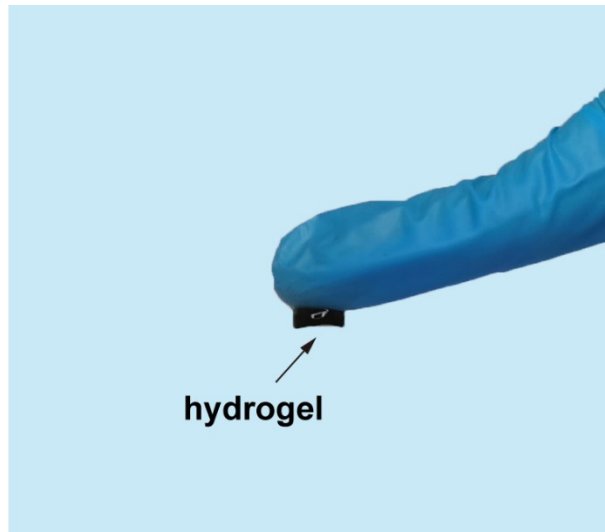

**Fig.S4** Hydrogel adhesive digital photo.

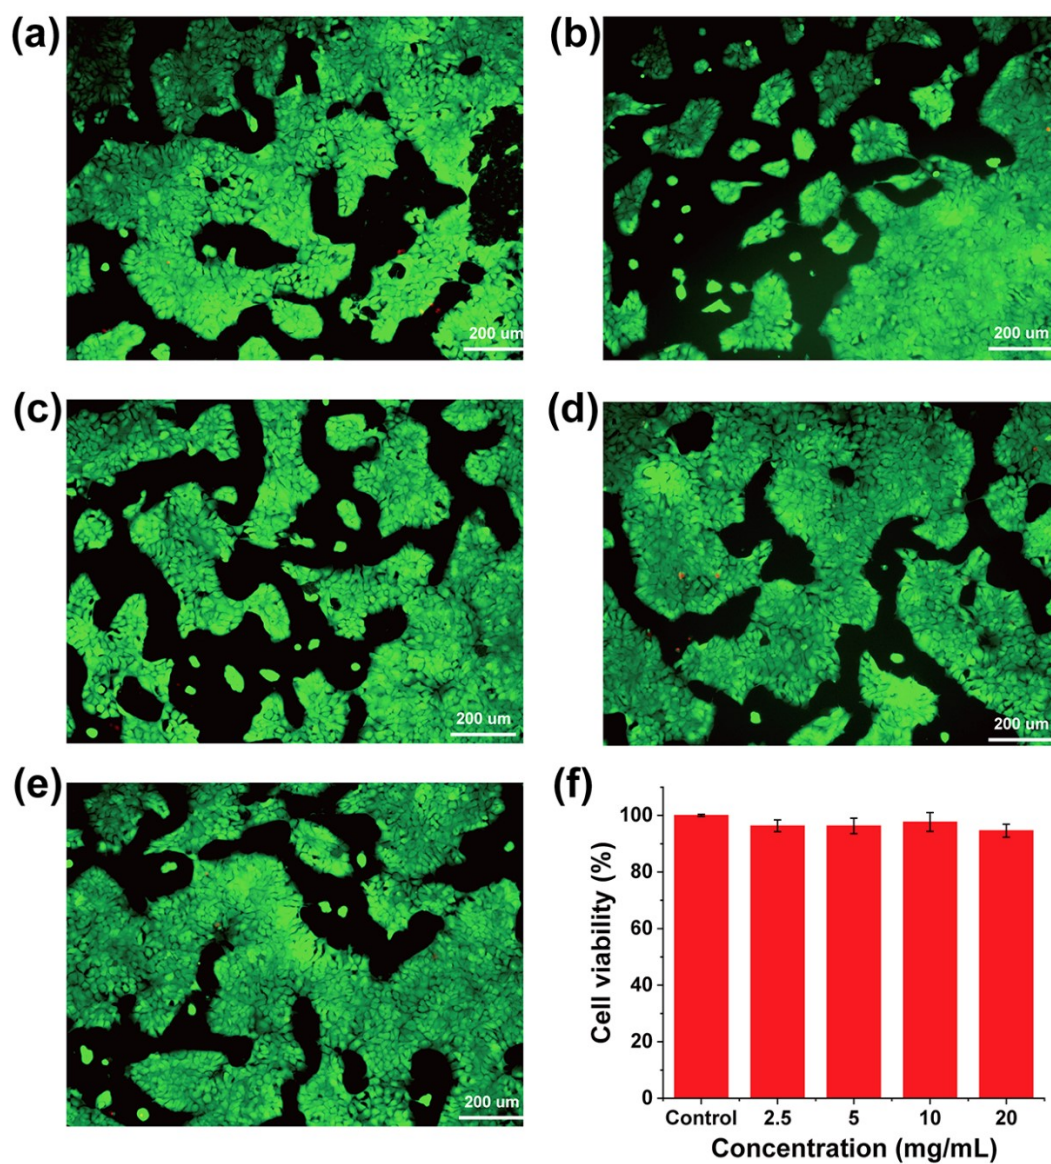

**Fig.S5** (a-e) Effects of different concentrations of GMH/PDA hydrogel on the viability of HaCat cells (a Control, b 2.5 mg/mL, c 5 mg/mL, d 10 mg/mL, e 20 mg/mL.); f the survival of HaCat cells co-incubated with different concentrations of GMH/PDA.
